# Supplementary material for: Validation of the English Version of the General Dietary Behavior Inventory (GDBI-E)
Source: Int J Environ Res Public Health. 2022 Mar 1;19(5):2883. doi: 10.3390/ijerph19052883 (PMC8910314; doi:10.3390/ijerph19052883)

**Table S1.** Items of the English Version of the General Dietary Behavior Inventory (GDBI-E) and Calculation of the GDBI-E score

| Item code | Behavior A                                                                                                                                                               | Scoring |   |   |   |   | Behavior B                                                                                                                                                               |
|-----------|--------------------------------------------------------------------------------------------------------------------------------------------------------------------------|---------|---|---|---|---|--------------------------------------------------------------------------------------------------------------------------------------------------------------------------|
| db1       | I eat different foods every day.                                                                                                                                         | 5       | 4 | 3 | 2 | 1 | I eat the same foods every day.                                                                                                                                          |
| db2       | My meals always include animal products (e.g., meat, fish, eggs, dairy products such as yogurt, cream, cheese).                                                          | 5       | 4 | 3 | 2 | 1 | My meals do not include animal products (e.g., meat, fish, eggs, dairy products such as yogurt, cream, cheese).                                                          |
| db3       | My meals always include plant-based products (e.g., vegetables, grain products, tofu products).                                                                          | 5       | 4 | 3 | 2 | 1 | My meals do not include plant-based products (e.g., vegetables, grain products, tofu products).                                                                          |
| db4       | I eat at least 2 servings of fruit daily.                                                                                                                                | 5       | 4 | 3 | 2 | 1 | I never eat fruit.                                                                                                                                                       |
| db5       | I eat at least 3 servings of vegetables daily.                                                                                                                           | 5       | 4 | 3 | 2 | 1 | I never eat vegetables.                                                                                                                                                  |
| db6       | I eat whole grain products (e.g., whole grain pasta, whole grain bread) instead of white flour products (e.g., "conventional" pasta, white bread/grain bread) every day. | 5       | 4 | 3 | 2 | 1 | I eat white flour products (e.g., "conventional" pasta, white bread/grain bread) instead of whole grain products (e.g., whole grain pasta, whole grain bread) every day. |
| db7       | I always consume vegetable fats (e.g., margarine and oils based on canola, olive, sunflower) instead of animal fats (butter, lard, etc.).                                | 5       | 4 | 3 | 2 | 1 | I always consume animal fats (butter, lard, etc.) instead of vegetable fats (e.g., margarine and oils based on olives, canola, sunflowers).                              |
| db8       | I do not eat sweets (e.g., chocolate, cookies, pastries).                                                                                                                | 5       | 4 | 3 | 2 | 1 | I eat sweets (e.g., chocolate, cookies, pastries) every day.                                                                                                             |
| db9       | I do not eat fast food and convenience foods (e.g., frozen pizza, microwave ready-to-eat meals).                                                                         | 5       | 4 | 3 | 2 | 1 | I eat fast food and convenience foods (e.g., frozen pizza, microwave ready-to-eat meals) daily.                                                                          |
| db10      | I do not drink sugary/sweetened beverages (e.g., juices, soda, sweetened coffee/tea).                                                                                    | 5       | 4 | 3 | 2 | 1 | I drink sugary/sweetened beverages (e.g., juices, lemonade, sweetened coffee/tea) daily.                                                                                 |
| db11      | I consume at least 1.5 liters of fluid daily (excluding alcoholic beverages or beverages containing sugar/sweeteners).                                                   | 5       | 4 | 3 | 2 | 1 | I consume less than 1.5 liters of fluid (excluding alcoholic beverages or beverages containing sugar/sweeteners) daily.                                                  |
| db12(r)   | When preparing meals, it is important to me that they are prepared quickly (e.g., quick frying, quick/spicy sautéing).                                                   | 1       | 2 | 3 | 4 | 5 | When preparing meals, it is important to me that they are prepared slowly (e.g., slow cooking/frying with medium heat).                                                  |
| db13      | When seasoning my meals, I make sure to use as little salt as possible.                                                                                                  | 5       | 4 | 3 | 2 | 1 | I like to use a lot of salt when seasoning my food.                                                                                                                      |
| db14(r)   | I drink alcohol regularly (daily or even every weekend).                                                                                                                 | 1       | 2 | 3 | 4 | 5 | I don't drink alcohol or drink it very rarely (only on special occasions).                                                                                               |
| db15      | I prefer to eat in peace without being distracted by anything.                                                                                                           | 5       | 4 | 3 | 2 | 1 | While eating, I like to occupy myself with other topics (e.g., watching TV, thinking about work, reading).                                                               |
| db16      | When taking my meals, I like to take my time.                                                                                                                            | 5       | 4 | 3 | 2 | 1 | I like to take my meals quickly.                                                                                                                                         |

GDBI-E score is calculated by adding up the scores given above for the items specified. For calculation of the GDBI-E score it is necessary that all items have been filled in and there are no missing values.

**Figure S1.** Stratified boxplot of GDBI-E score per general diet

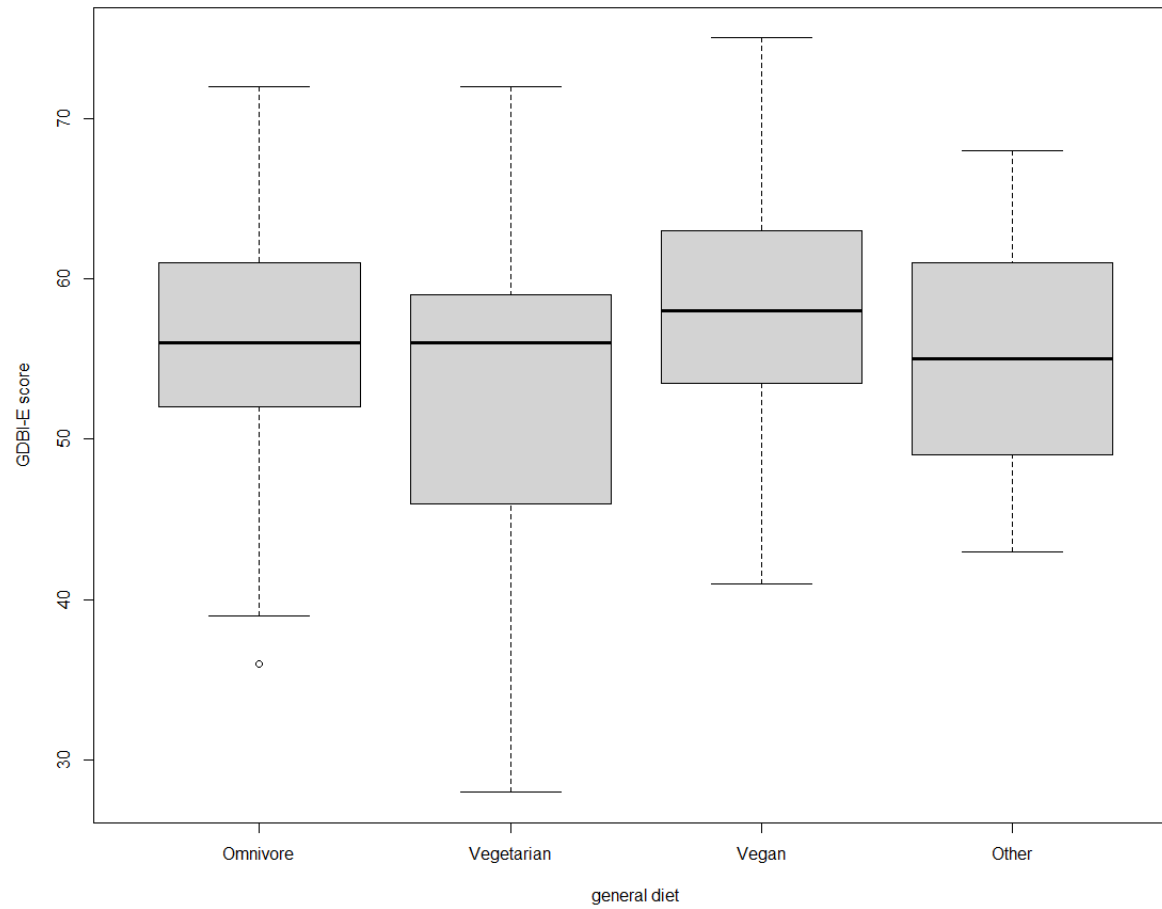

Supplement: Supplementary file 1 [file ijerph-19-02883-s001.zip › ijerph-1571563-supplementary.pdf]
